# Supplementary material
Source: Springer Nature journal article supplement (https://www.springerprofessional.de/resource/supplementary/40192_2012_3_MOESM6_ESM.pdf/11899468)

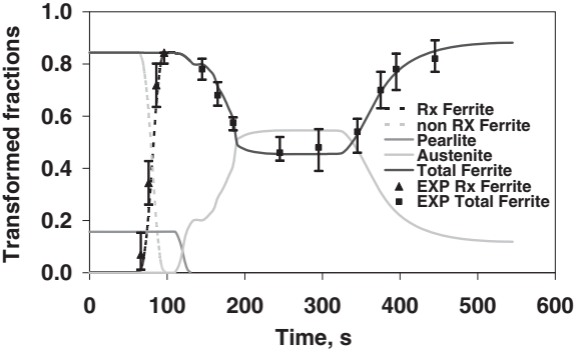

Supplement: MOESM6 [file 11899468]
